# Supplementary material for: Inequalities of Suicide Mortality across Urban and Rural Areas: A Literature Review
Source: MDPI journal article supplement (doi:10.3390/ijerph19052669), 2022-02-25
Supplement: s1 [file s1]

## Supplementary Materials

Table S1: Eligibility criteria

| Category   | Inclusion                                    | Exclusion                                                                                                                                                                                                                                                                 |
|------------|----------------------------------------------|---------------------------------------------------------------------------------------------------------------------------------------------------------------------------------------------------------------------------------------------------------------------------|
| Population | Studies on people $\geq 15$ years            | Studies that focus on children or adolescents ( $\leq 15$ years); studies that did not specify the age of the population; studies without age restriction of the population; animal studies.                                                                              |
| Exposure   | Urban or rural (living) area or environment. | No measurement of urban or rural (living) area of environment; no clear description of how urban or rural area is defined; no comparison between urban and rural areas; no use of the words urban or rural; areas or cities used that were not defined as urban or rural. |
| Outcome    | Completed suicide.                           | Suicidal ideation, suicide attempt(s), depression, anxiety, stress, other cognitive dysfunctions that can affect suicidal thoughts.                                                                                                                                       |

Table S2: Search strategy for each database (May 26, 2021)

| Database       | Search strategy                                                                                                                                        | Number of studies |
|----------------|--------------------------------------------------------------------------------------------------------------------------------------------------------|-------------------|
| Embase         | suicide:ti AND (rural:ti OR urban:ti OR spatial:ti OR geography:ti) AND [english]/lim                                                                  | 402               |
| PubMed         | ("suicide"[Title] AND ("urban"[Title] OR "rural"[Title] OR "geography"[Title]) AND (english[Filter]))                                                  | 335               |
| PsychInfo      | #1 (suicide and (urban or rural or spatial or geography)).ti.<br>#2 limit 1 to English language                                                        | 307               |
| Scopus         | #1 (TITLE ( suicide ) AND LANGUAGE ( english ) )<br><br>#2 (TITLE (urban OR rural OR spatial OR geography) AND LANGUAGE ( english ) )<br><br>#1 AND #2 | 497               |
| Web of Science | TITLE: (suicide AND (urban OR rural OR spatial OR geography)) AND LANGUAGE: (English)                                                                  | 493               |

Table S3: Exclusion reasons for full-text articles

| Reasons                                                        | Reference                                                                                                                                                                                                                                                                                                                                                                                                                                                                         |
|----------------------------------------------------------------|-----------------------------------------------------------------------------------------------------------------------------------------------------------------------------------------------------------------------------------------------------------------------------------------------------------------------------------------------------------------------------------------------------------------------------------------------------------------------------------|
| No definition of rural or urban areas ( <i>n</i> =24)          | Asevedo et al. [1]; Burnley [2]; Burrows et al. [3]; Chambers & Harvey [4]; Chang et al. [5]; Congdon [6]; Dantas et al. [7]; Dudley et al. [8]; Günay & Mert Kantar [9]; Gunnell et al. [10]; Guo et al. [11]; Heleniak [12]; Kelly et al. [13]; Lin et al. [14]; Macente & Zandonade [15]; Ngamini Ngui et al. [16]; Phillips [17]; Qi et al. [18]; Santana et al. [19]; Stark et al. [20]; Sugg et al. [21]; Tomita et al. [22]; Wilkinson & Israel [23]; Yoshioka et al. [24] |
| No comparison of rural and urban suicide rates ( <i>n</i> =10) | Cullen & Connolly [25]; Duckworth & McBride [26]; Gallagher & Sheehy [27]; Gelfand [28]; Kim & Kim [29]; Nestadt et al. [30]; Qi et al. [31]; Renwick et al. [32]; Searles et al. [33]; Tamosiunas et al. [34]                                                                                                                                                                                                                                                                    |
| Review article ( <i>n</i> =6)                                  | Baume & Clinton [35]; Crnek-Georgeson et al. [36]; Hirsch [37]; Hirsch & Cukrowicz [38]; Lester [39]; Li & Katikireddi [40]                                                                                                                                                                                                                                                                                                                                                       |
| Age <15 included ( <i>n</i> =4)                                | Coombs et al. [41]; Ivey-Stephenson et al. [42]; Kapusta et al. [43]; Reccord et al. [44]                                                                                                                                                                                                                                                                                                                                                                                         |
| All ages/no age restriction ( <i>n</i> =5)                     | Helbich et al. [45]; Bridges & Clark [46]; Micciolo et al. [47]; Chen et al. [48]; Pettrone & Curtin [49]                                                                                                                                                                                                                                                                                                                                                                         |
| Book chapter ( <i>n</i> =1)                                    | Günay [50]                                                                                                                                                                                                                                                                                                                                                                                                                                                                        |
| Only available in Spanish ( <i>n</i> =1)                       | Chaparro-Narváez et al. [51]                                                                                                                                                                                                                                                                                                                                                                                                                                                      |
| Random sample ( <i>n</i> =1)                                   | Isometsä et al. [52]                                                                                                                                                                                                                                                                                                                                                                                                                                                              |
| Changes in rates per 100,000 ( <i>n</i> =1)                    | Middleton et al. [53]                                                                                                                                                                                                                                                                                                                                                                                                                                                             |
|                                                                |                                                                                                                                                                                                                                                                                                                                                                                                                                                                                   |

Table S4: Criteria for quality assessment of the selected studies

| Bias Criteria                                                                                                                                                                                                                                                                                                 |
|---------------------------------------------------------------------------------------------------------------------------------------------------------------------------------------------------------------------------------------------------------------------------------------------------------------|
| <p>Sample representativeness:</p> <p>0 = No information provided or specific population group (e.g., narrow age range, disease status, socioeconomic status/education selection);</p> <p>1 = Reasonably representative of the general population, indicated by sampling method and/or provided comparison</p> |
| <p>Consistency of population in rural and urban group</p> <p>0 = No information provided of group in rural and urban areas or population in rural and urban areas is not consistent</p> <p>1 = Population in rural and urban group is consistent</p>                                                          |
| <p>Study period</p> <p>0 = Study period is not clearly described or not given at all.</p> <p>1 = Study period is described clearly.</p>                                                                                                                                                                       |
| <p>Source of data</p> <p>0 = Source of suicide rates is not given or source of suicide rates is not credible.</p> <p>1 = Source of suicide rates is given and credible.</p>                                                                                                                                   |
| <p>Study controls for other variables</p> <p>0 = Study does not control for other variables.</p> <p>1 = Study controls for age.</p> <p>2 = Study controls for age and other factors.</p>                                                                                                                      |
| <p>Assessment of the outcome</p> <p>0 = No reference to records is made to satisfy the requirement for confirmation of completed suicide.</p> <p>1 = Independent or blind assessment stated in the study, or confirmation of the outcome by reference to secure records.</p>                                  |
| <p>Presentation of the results</p> <p>0 = Results are not clearly presented in the study or not complete.</p> <p>1 = Results are clearly presented in the study.</p>                                                                                                                                          |
| <p>Exploring trends over time</p> <p>0 = Study did not explore trends over time.</p> <p>1 = Study did explore trends over time.</p>                                                                                                                                                                           |

Table S5: Newcastle-Ottawa risk of bias scores for the included studies

[illegible]
